# Supplementary material
Source: PubMed Central journal article supplement (PMC4203521)
Supplement: auto-10-1454-s01.pdf [file auto-10-1454-s01.pdf]

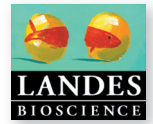

## **Supplemental Material to:**

**Pei-Feng Liu, Chung-Man Leung, Yu-Hsiang Chang,  
Jin-Shiung Cheng, Jih-Jung Chen, Chung-Jeu Weng,  
Kuo-Wang Tsai, Chien-Jen Hsu, Yen-Chen Liu, Ping-Chi Hsu,  
Hung-Wei Pan, and Chih-Wen Shu**

**ATG4B promotes colorectal cancer growth independent  
of autophagic flux**

**Autophagy 2014; 10(8)**

**<http://dx.doi.org/10.4161/auto.29556>**

**[www.landesbioscience.com/journals/autophagy/article/29556](http://www.landesbioscience.com/journals/autophagy/article/29556)**

**A**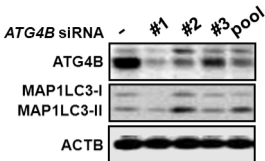**B**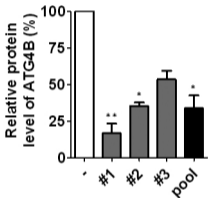**C**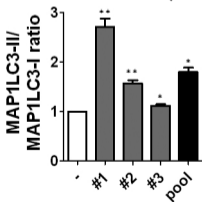**Fig. S1**

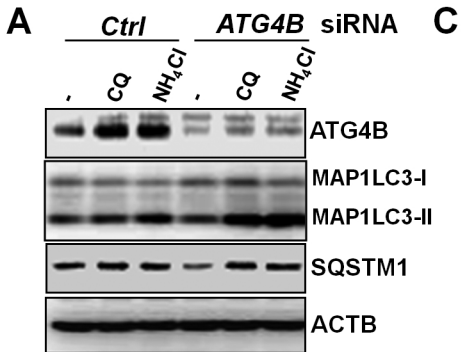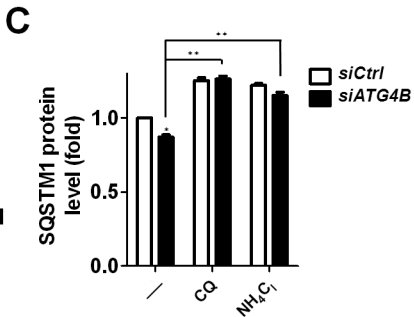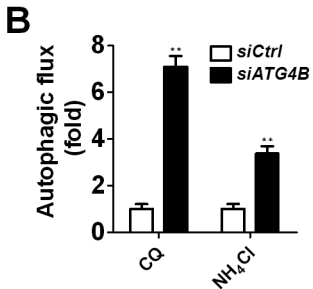

**Fig. S2**

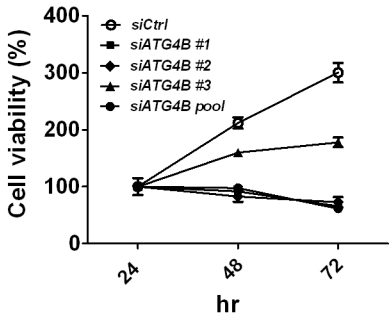

**Fig. S3**

siRNA

*Ctrl*

*ATG4B*

Caco2

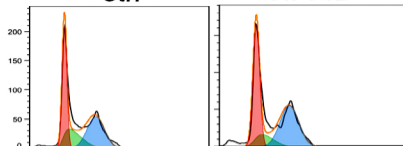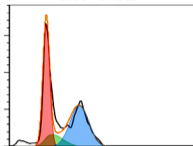

HCT116

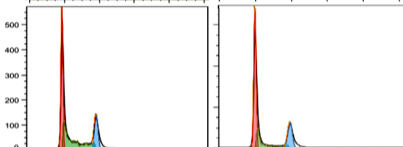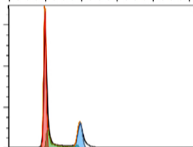

HT-29

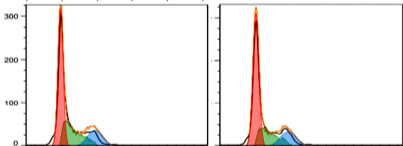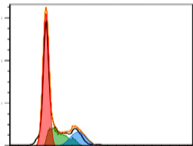

T84

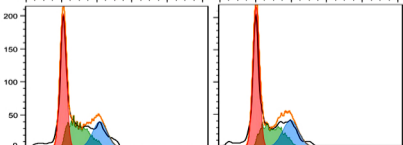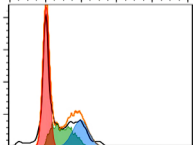

**Fig. S4**

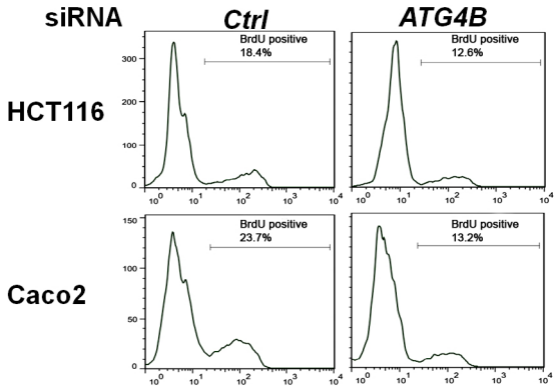

**Fig. S5**

**A**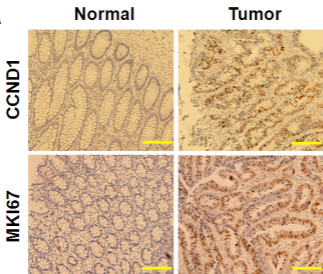**B**

| N=20   | CCND1 expression |                  |                          | p-value |
|--------|------------------|------------------|--------------------------|---------|
|        | Negative         | Low<br>(score<5) | High<br>(score $\geq$ 5) |         |
| Normal | 20 (100%)        | 0 (0%)           | 0 (0%)                   | <0.001  |
| Tumor  | 0                | 9 (45%)          | 11 (55%)                 |         |

  

| N=20   | MKI67 expression |                  |                          | p-value |
|--------|------------------|------------------|--------------------------|---------|
|        | Negative         | Low<br>(score<5) | High<br>(score $\geq$ 5) |         |
| Normal | 20 (100%)        | 0 (0%)           | 0 (0%)                   | <0.001  |
| Tumor  | 0                | 12 (60%)         | 8 (40%)                  |         |

**Fig. S6**

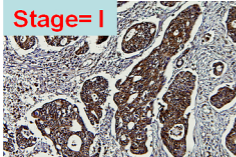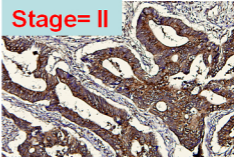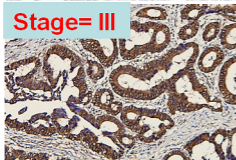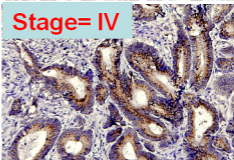

| N=20                    | ATG4B expression  |                    |
|-------------------------|-------------------|--------------------|
|                         | Low (IS $\leq$ 1) | High (IS $\geq$ 2) |
| Low Stage<br>( I )      | 2 (40%)           | 3 (60%)            |
| High Stage<br>( II~IV ) | 4 (27%)           | 11 (73%)           |

**Fig. S7**



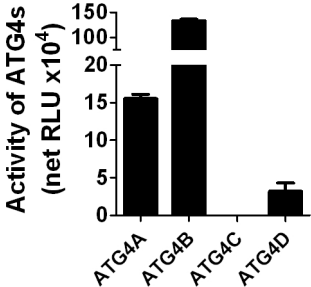

**Fig. S8**

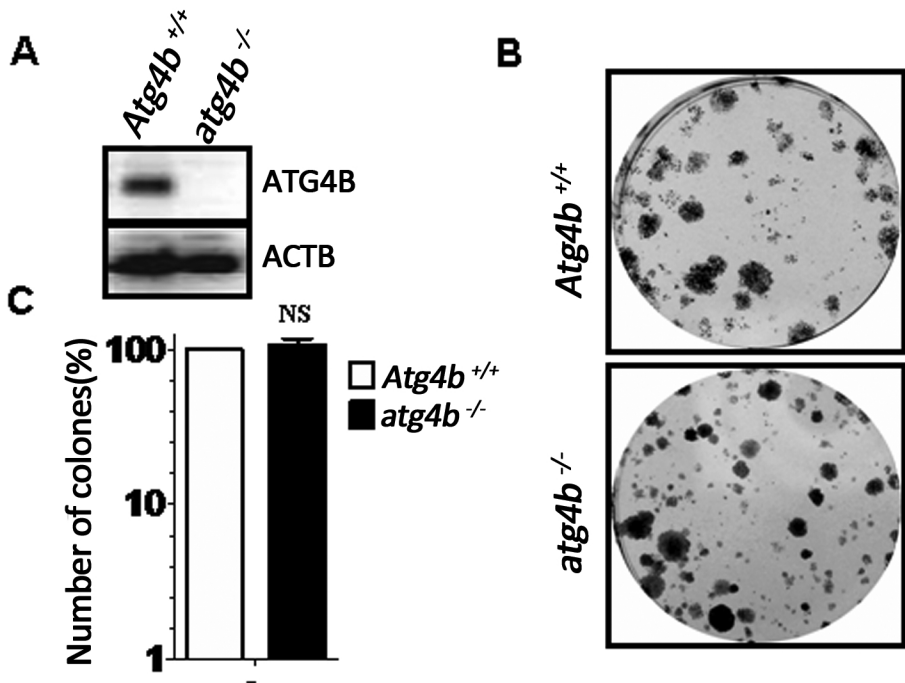

**Fig. S9**

**Figure S1.** Silencing *ATG4B* elevated MAP1LC3-II conversion in human colorectal cancer cells. **(A)** Scrambled siRNA (5 nM, *siCtrl*) or 3 individual siRNAs against *ATG4B* (5 nM, *siATG4B*) was transfected into human colorectal cancer HCT116 cells, and the cells were harvested after 72 h. The cells were lysed for immunoblotting to determine the protein levels of ATG4B, MAP1LC3-I, MAP1LC3-II, and ACTB. **(B)** The knockdown efficiency of ATG4B was quantitated using ACTB as the normalization control. **(C)** The ratio of MAP1LC3-II/MAP1LC3-I as an autophagy marker was employed to determine the effect of silencing *ATG4B* on autophagy. The results are expressed as the mean  $\pm$  SEM from 3 individual experiments.

**Figure S2.** Silencing *ATG4B* induced autophagic flux in human colorectal cancer Caco2 cells. **(A)** Human colorectal cancer Caco2 cells were transfected with 5 nM scrambled siRNA (*siCtrl*) or siRNA against *ATG4B* (*siATG4B*) for 72 h and treated with or without (-) 20  $\mu$ M CQ or 2 mM NH<sub>4</sub>Cl for 2 h. MAP1LC3-II accumulation and SQSTM1 degradation were examined by immunoblotting to determine the autophagic flux in the *ATG4B*-silenced cells. The level of **(B)** MAP1LC3-II accumulation and **(C)** SQSTM1 degradation in the cells was quantitated. The results are expressed as the mean  $\pm$  SEM from 3 individual experiments.

**Figure S3.** Knockdown of *ATG4B* reduced cell viability in a time-dependent manner. Human colorectal cancer HCT116 cells stably expressing luciferase were seeded in 384-well plate in the presence of 5 nM scrambled siRNA (*siCtrl*) or 3 individual (#1, #2, and #3) or pool siRNA against *ATG4B*. The cell viability was measured with 200  $\mu$ M D-luciferin every 24 h until 72 h. The cells with scrambled siRNA at time 24 h were used for normalization. The results are expressed as the mean  $\pm$  SEM from 3 individual experiments.

**Figure S4.** Silencing *ATG4B* arrested the cell cycle at G<sub>1</sub> phase in human colorectal cancer cell lines. Human colorectal cancer HCT116, Caco2, HT-29, and T84 cells were transfected with 5 nM scrambled siRNA (*siCtrl*) or siRNA against *ATG4B* (*siATG4B*) for 72 h. The knockdown cells were fixed and stained with propidium iodide to examine the proportions of the cell cycle by flow cytometry.

The cell cycle profiles were performed from 3 individual experiments and representative data for each cell line are shown.

**Figure S5.** Silencing *ATG4B* reduced cell proliferation in human colorectal cancer cells. Human colorectal cancer HCT116 (upper panel) or Caco2 (lower panel) cells were transiently transfected with 5 nM scrambled siRNA or siRNA against *ATG4B* for 72 h, followed by a BrdU incorporation assay to determine the role of *ATG4B* in G<sub>1</sub>/S phase progression. The gate is represented as BrdU-positive (S phase) cells. The results shown are representative from 3 individual experiments.

**Figure S6.** CCND1 and MKI67 expression were elevated in tumor specimens of colorectal cancer patients. **(A)** The expression level of CCND1 and MKI67 in colorectal cancer was determined by immunohistochemistry. Both CCND1 and MKI67 were only expressed in the colorectal tumor cells and not in the adjacent normal tissues (stroma and goblet cells). **(B)** The Allred scoring system was employed to obtain the sum of a proportion score and intensity score for CCND1 and MKI67 protein level. The protein level of CCND1 and MKI67 in the tumor and adjacent normal cells was quantified and are shown in the upper and lower panels, respectively ( $P < 0.001$ ). Twenty tissue samples from colorectal cancer patients were used to determine the protein level. Scale bar: 200  $\mu$ m.

**Figure S7.** *ATG4B* expression was associated with tumor stages of colorectal cancer patients. *ATG4B* expression at various stages of colorectal cancer was determined by immunohistochemistry. Five tissue samples from colorectal cancer patients for each stage were used to determine the correlation of *ATG4B* expression with progression of colorectal cancer.

**Figure S8.** Proteolysis activity of *ATG4s* on the MAP1LC3-PLA<sub>2</sub> reporter assay. Recombinant *ATG4A* (5 nM), *ATG4B* (0.05 nM), *ATG4C* (50 nM), or caspase-3 (CASP3)-cleaved *ATG4D* (50 nM) was mixed with 100 nM MAP1LC3B-PLA<sub>2</sub> in the PLA<sub>2</sub> buffer containing 20  $\mu$ M NBD-C<sub>6</sub>-HPC in a total volume of 100  $\mu$ l. Activation of PLA<sub>2</sub> was monitored with excitation and emission filters of 485 nm and 530 nm, respectively. The results are expressed as the mean  $\pm$  SEM from 3 individual experiments.

**Figure S9.** The cell growth rate was similar between *Atg4b*<sup>+/+</sup> and *atg4b*<sup>-/-</sup> 3T3 cells. **(A)** The protein expression of ATG4B in *Atg4b*<sup>+/+</sup> and *atg4b*<sup>-/-</sup> 3T3 cells was verified by immunoblotting. **(B)** *Atg4b*<sup>+/+</sup> and *atg4b*<sup>-/-</sup> 3T3 cells were seeded in 6-well plates at a density of 1 x10<sup>3</sup> cells/ml and grown for 16 d. The cells were fixed and stained with crystal violet for clonogenic assay. **(C)** The colonies were counted, and the data were analyzed using Prism 5.0. The results are expressed as the mean ± SEM from 3 individual experiments.
